# Supplementary material for: Molecular engineering of organic semiconductors enables noble metal-comparable SERS enhancement and sensitivity
Source: PubMed Central journal article supplement (PMC6890673; doi:10.1038/s41467-019-13505-7), 2019-12-03
Supplement: 41467_2019_13505_MOESM1_ESM.pdf [file 41467_2019_13505_MOESM1_ESM.pdf]

## **Supplementary Information**

### **Molecular Engineering of Organic Semiconductors Enables Noble Metal-Comparable SERS Enhancement and Sensitivity**

Demirel et al.

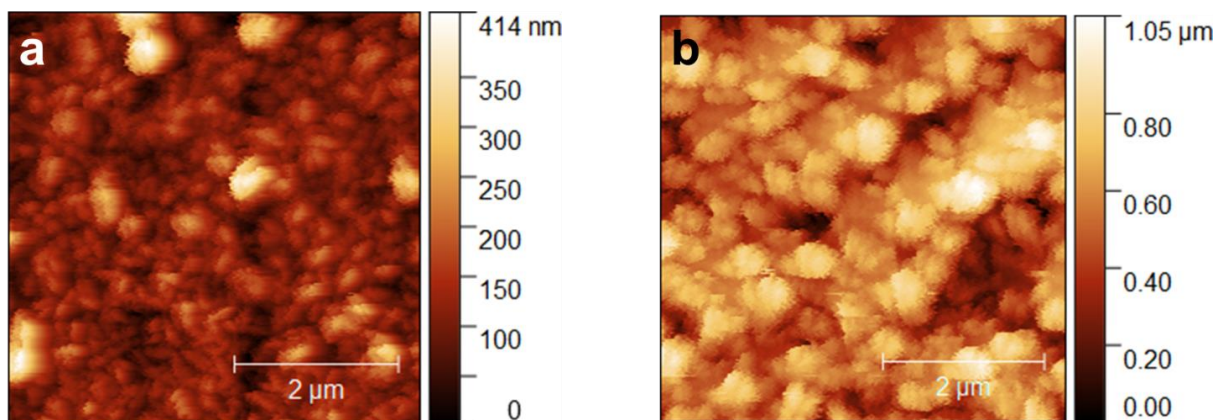

**Supplementary Figure 1.** AFM images of **DFP-4T** ( $1.1 \pm 0.2 \mu\text{m}$  of thickness) (a) and **DFPCO-4T** ( $1.7 \pm 0.4 \mu\text{m}$  of thickness) (b) films.

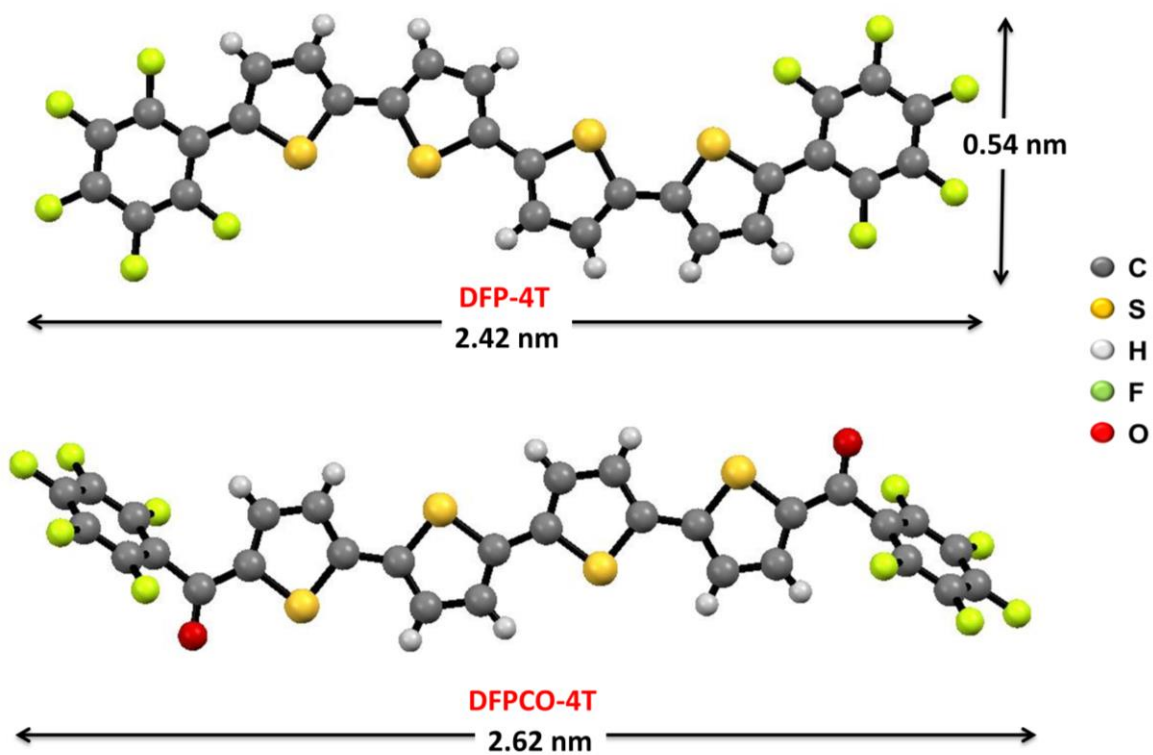

**Supplementary Figure 2.** Three dimensional molecular structures and lengths along the long molecular axis for **DFP-4T** and **DFPCO-4T** based on the single-crystal structure parameters.

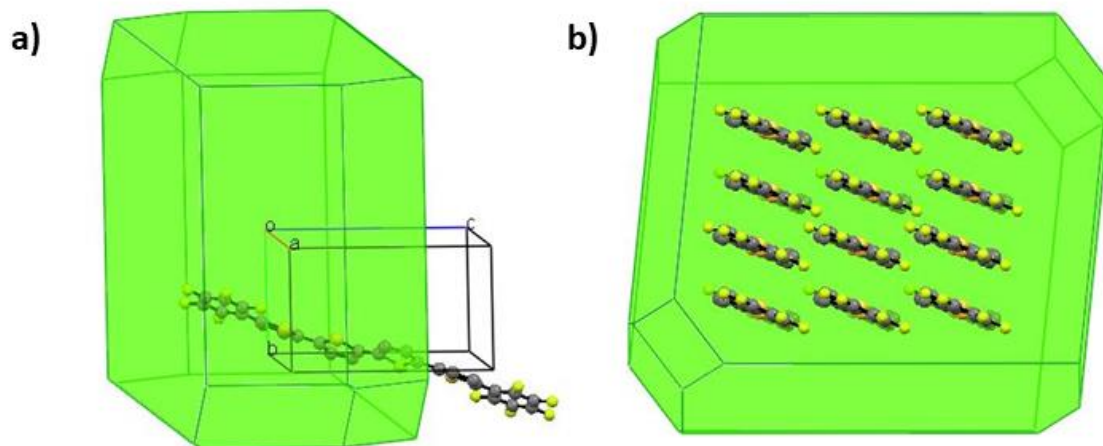

**Supplementary Figure 3.** BFDH (Bravais, Friedel, Donnay and Harker) theoretical crystal morphology simulated based on the single-crystal structure and view of the unit cell for **DFP-4T** (a), and molecular arrangement/packing in the 2-D crystal plane (b).

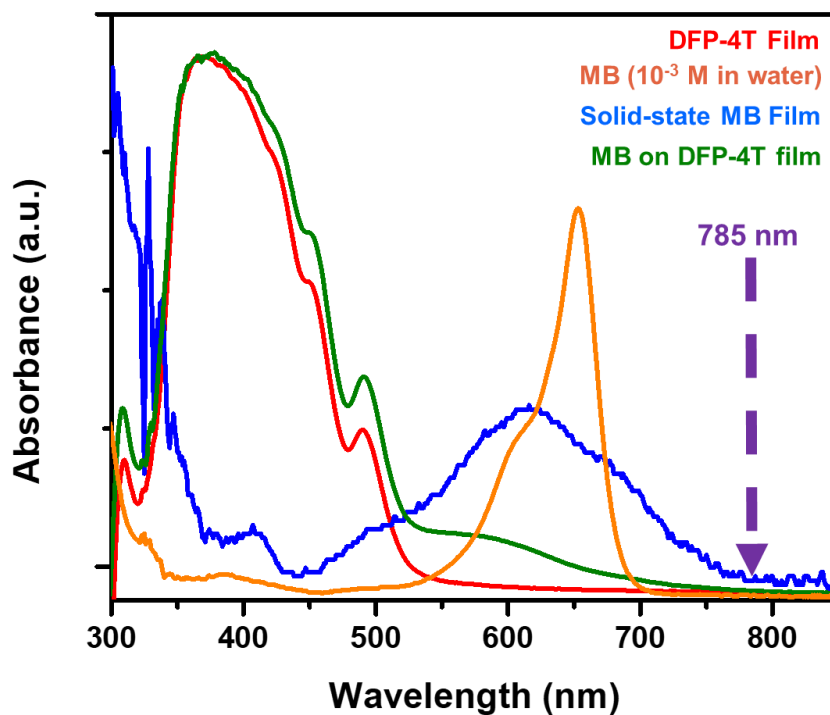

**Supplementary Figure 4.** UV-vis spectra of **MB** in aqueous solution ( $10^{-5}$  M) and solid state, pristine **DFP-4T** ( $\sim 1.1 \mu\text{m}$ ) and  $10^{-5}$  M of **MB** deposited **DFP-4T** films. (All samples were fabricated on cleaned glass slides).

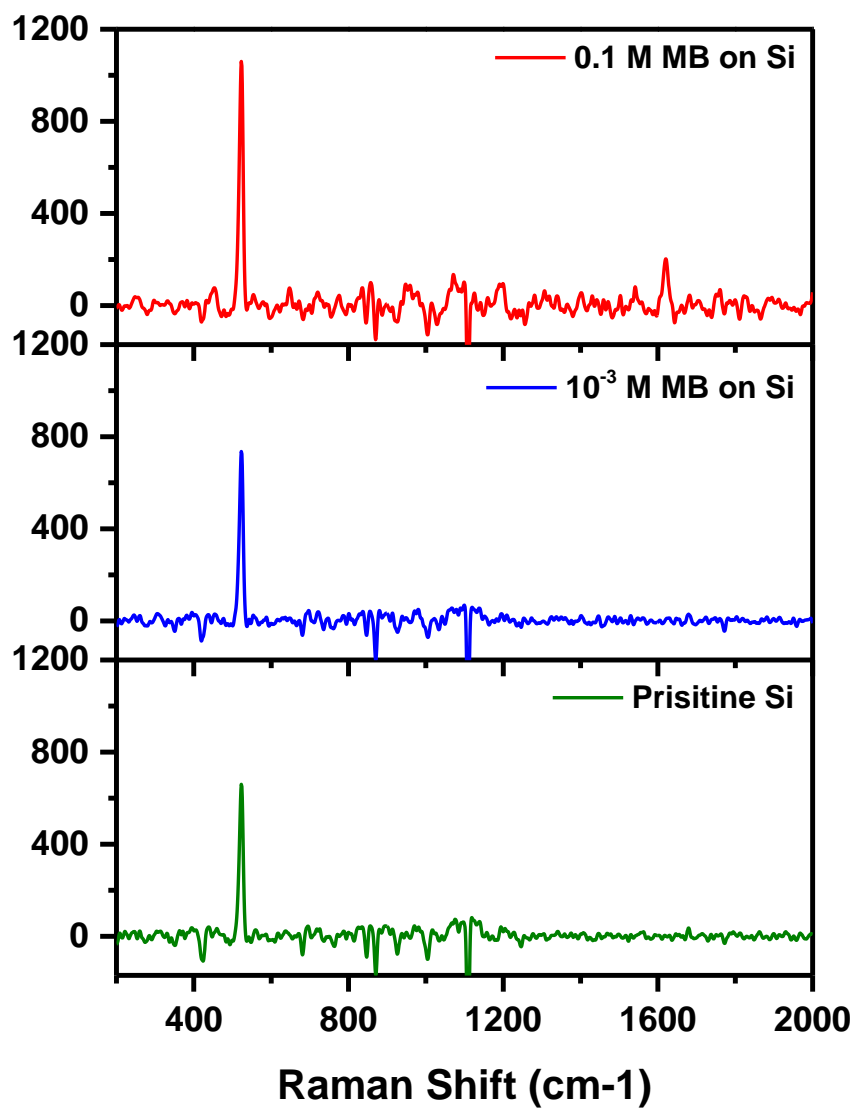

Supplementary Figure 5. SERS spectra of MB on reference silicon substrates.

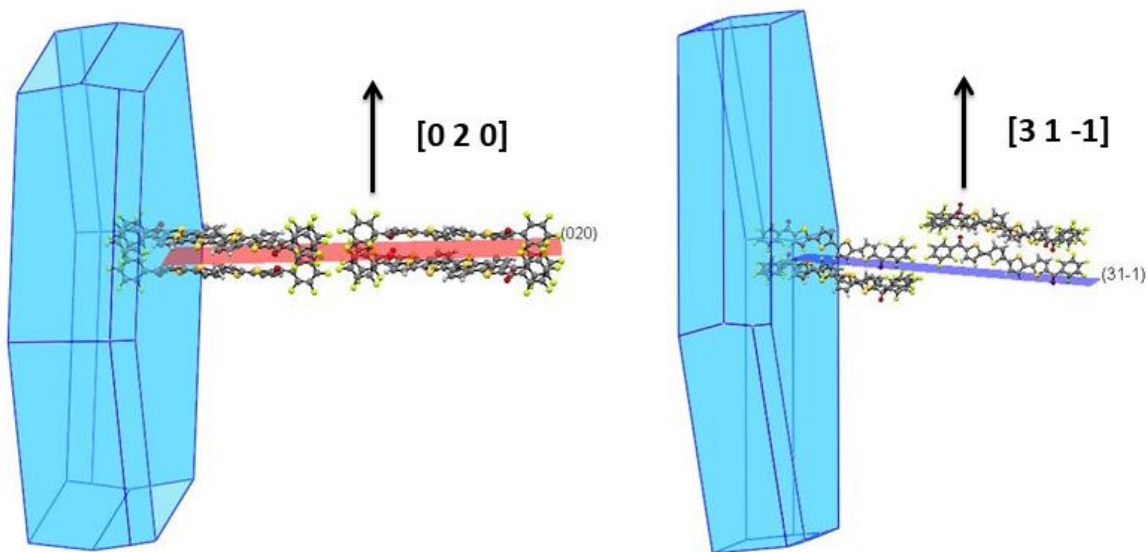

**Supplementary Figure 6.** BFDH (Bravais, Friedel, Donnay and Harker) theoretical crystal morphology simulated based on the single-crystal structure, and the views of molecular arrangements/packings along  $[0\ 2\ 0]$  and  $[3\ 1\ -1]$  crystallographic directions for **DFPCO-4T**.

| Substrate | HOMO Energy (eV) | CT Excited State Energy (eV) | CT Excited State Oscillator Strength | SERS Enhancement Factor (CT resonance) | SERS Enhancement Factor (1.43 eV) |
|-----------|------------------|------------------------------|--------------------------------------|----------------------------------------|-----------------------------------|
| DFH-2T    | -7.86            | 2.04                         | 0.681                                | $4.8 \times 10^4$                      | 0.4                               |
| DFH-3T    | -7.30            | 1.72                         | 0.014                                | $9.7 \times 10^2$                      | 0.8                               |
| DFH-4T    | -7.10            | 1.43                         | 0.011                                | $2.3 \times 10^3$                      | $2.3 \times 10^3$                 |
| DFH-5T    | -6.80            | 1.25                         | 0.030                                | $3.5 \times 10^5$                      | 25.3                              |

**Supplementary Table 1.** Highest occupied molecular orbital (HOMO) energies of isolated substrate molecules; CT excited state energies and oscillator strengths; and SERS enhancement factors for the substrate-**MB** complexes at the INDO/SCI level.
